# Supplementary material for: Why is the Indo-Gangetic Plain the region with the largest NH 3 column in the globe during pre-monsoon and monsoon seasons?
Source: Copernicus journal article supplement (doi:10.5194/acp-20-8727-2020), 2020-07-23
Supplement: Supplementary file 1 [file acp-20-8727-2020-supplement.pdf]

Supplement of Atmos. Chem. Phys., 20, 8727–8736, 2020  
<https://doi.org/10.5194/acp-20-8727-2020-supplement>  
© Author(s) 2020. This work is distributed under  
the Creative Commons Attribution 4.0 License.

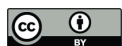

*Supplement of*

## **Why is the Indo-Gangetic Plain the region with the largest $\text{NH}_3$ column in the globe during pre-monsoon and monsoon seasons?**

**Tiantian Wang et al.**

*Correspondence to:* Yu Song (songyu@pku.edu.cn)

The copyright of individual parts of the supplement might differ from the CC BY 4.0 License.

## **Contents of this file**

Figures S1 to S5

Tables S1 to S2

## **Introduction**

This supporting information consists of the following parts. Figure S1 shows spatial distributions of the emission fluxes of NH<sub>3</sub>, SO<sub>2</sub> and NO<sub>x</sub> over East Asia from June to August 2010 estimated using MIX database. Figure S2 shows the spatial distributions of SO<sub>2</sub> and NO<sub>2</sub> columns over East Asia. Figure S3 provides the comparison of the simulated SO<sub>4</sub><sup>2-</sup> and NO<sub>3</sub><sup>-</sup> concentrations in the base case and the increased emissions case. Figure S4 shows the spatial distribution of the NH<sub>3</sub> total columns from June to August 2010 derived from IASI measurements. Figure S5 shows spatial distributions of WRF-Chem predicted relative humidity and precipitation from June to August 2010, and the circles in Figure S5a represent the observed relative humidity obtained from NCDC dataset. Table S1 lists the options of WRF-Chem configurations. Table S2 provides the performance statistics of meteorological predictions of WRF-Chem.

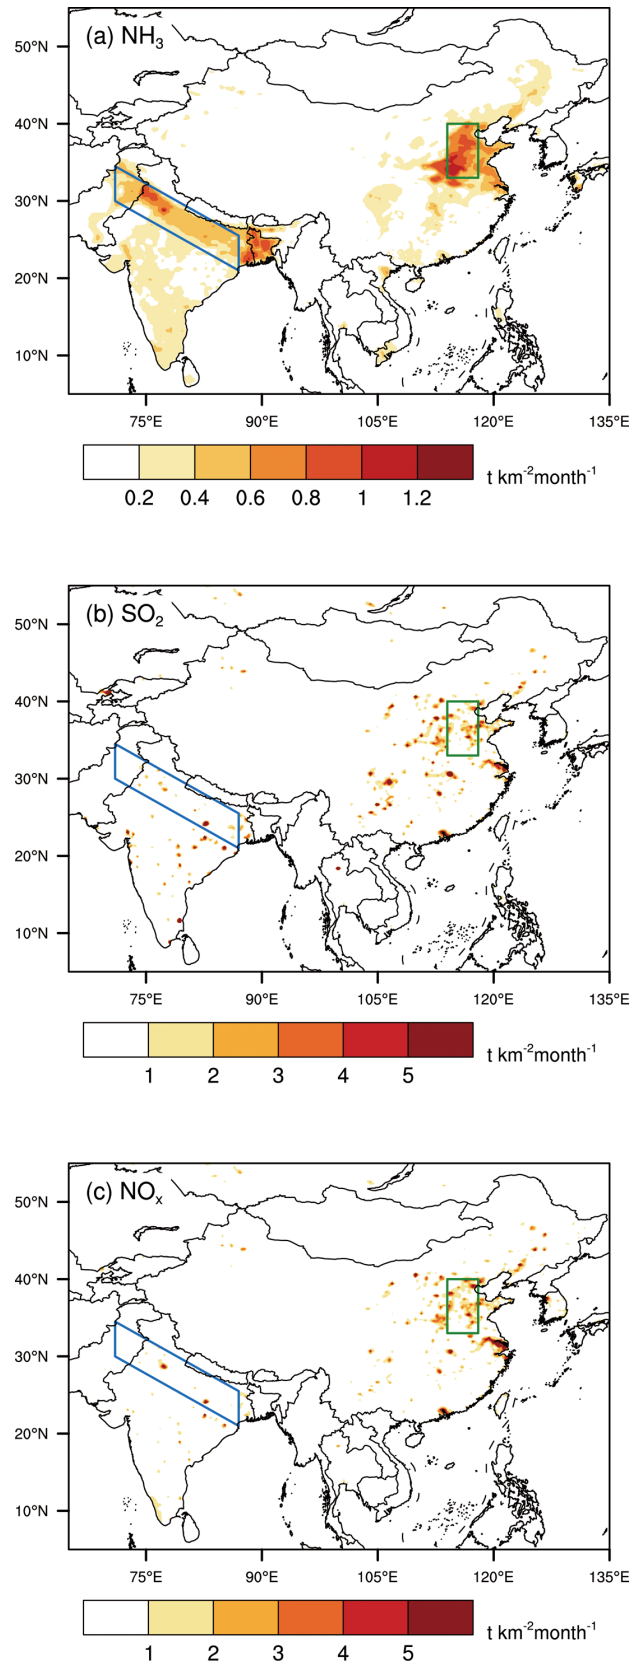

**Figure S1.** Spatial distributions of emission fluxes of (a) NH<sub>3</sub>, (b) SO<sub>2</sub>, and (c) NO<sub>x</sub> over East Asia from June to August 2010. The blue quadrangle represents the IGP, and the green quadrangle represents the NCP.

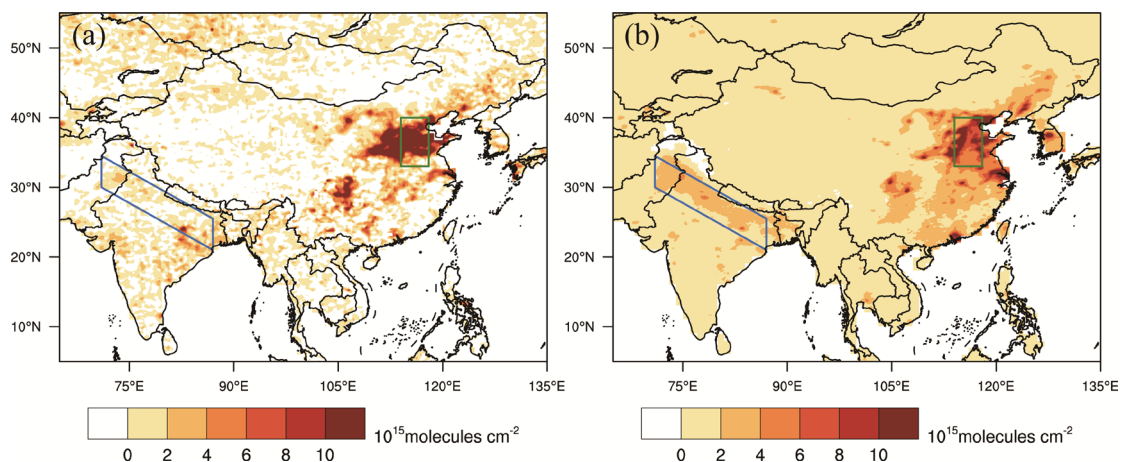

**Figure S2.** The spatial distributions of (a) SO<sub>2</sub> and (b) NO<sub>2</sub> columns over East Asia from June to August 2010.

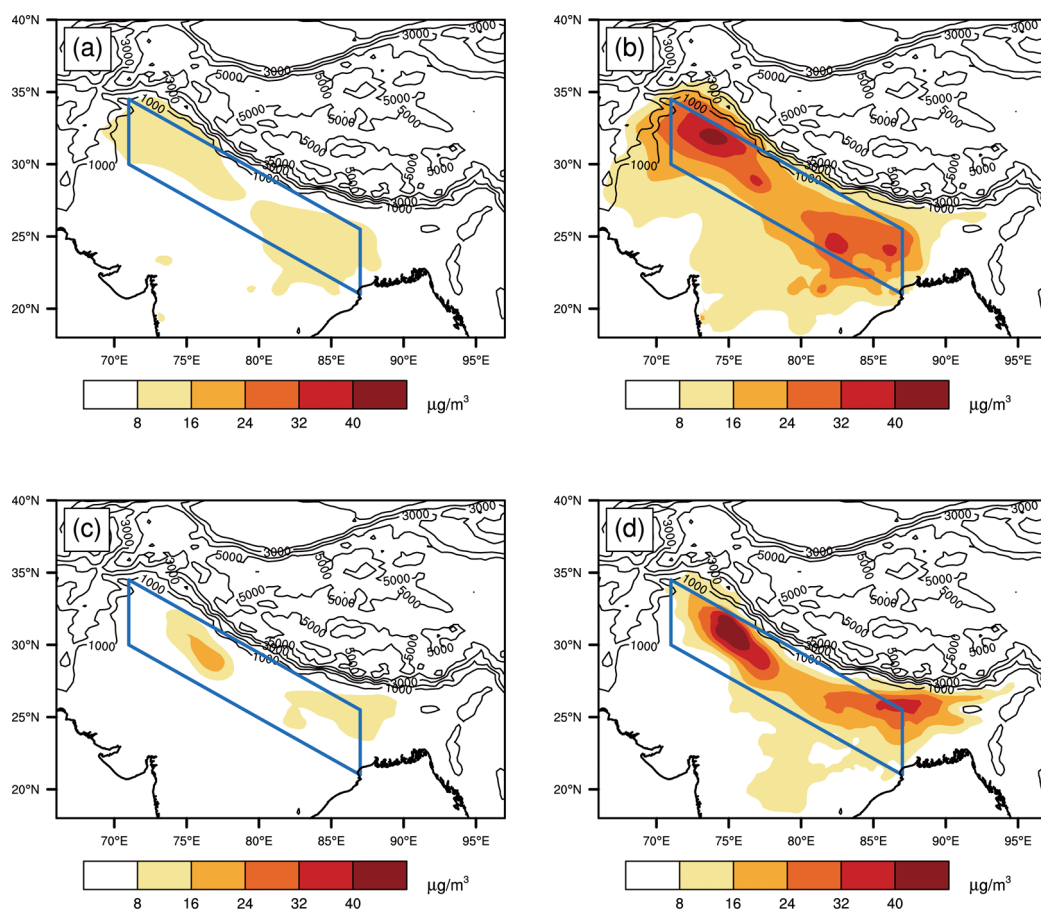

**Figure S3.** Spatial distributions of WRF-Chem predicted SO<sub>4</sub><sup>2-</sup> and NO<sub>3</sub><sup>-</sup> concentrations from June to August 2010. (a) and (b) are SO<sub>4</sub><sup>2-</sup> concentrations in the base case and the increased emissions case, respectively. (c) and (d) are NO<sub>3</sub><sup>-</sup> concentrations in the base case and the increased emissions case, respectively.

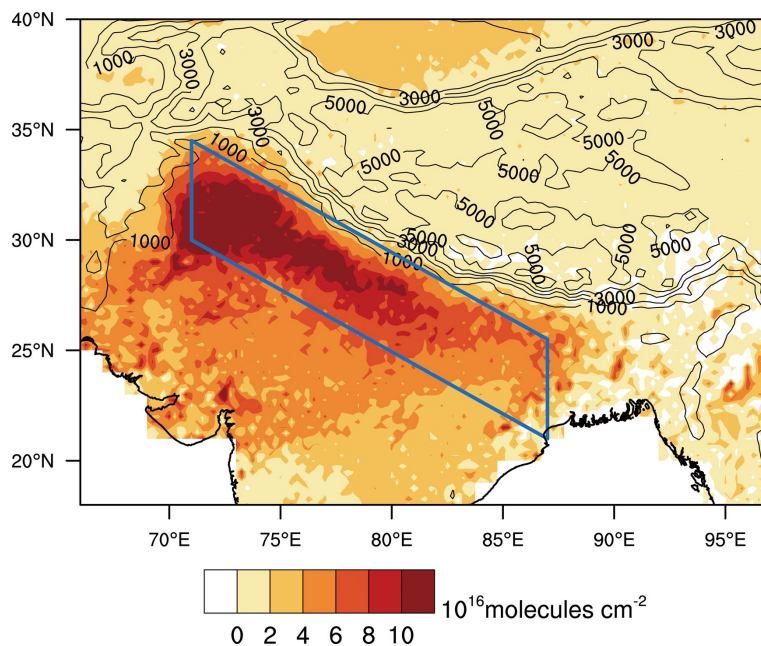

**Figure S4.** The spatial distribution of NH<sub>3</sub> total columns from June to August 2010 retrieved from IASI measurements.

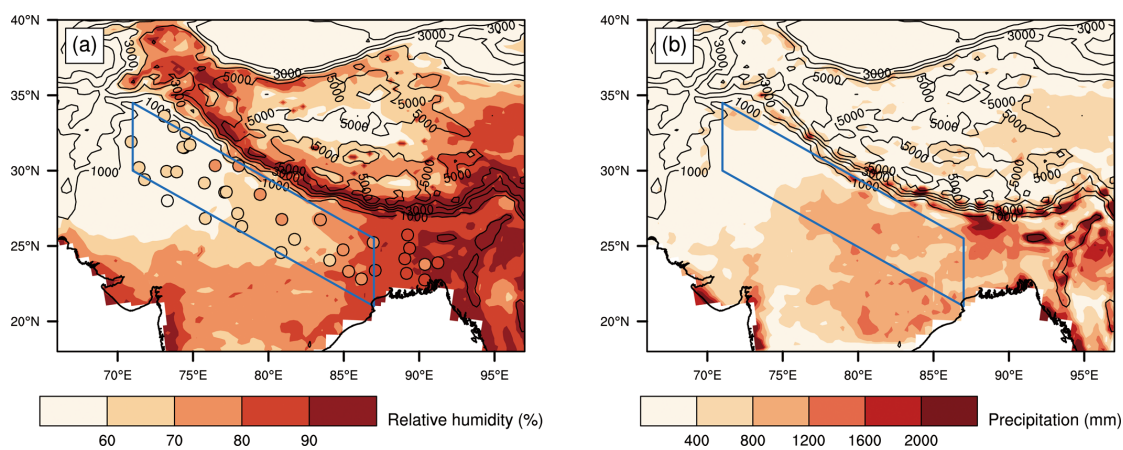

**Figure S5.** Spatial distributions of WRF-Chem predicted meteorological variables from June to August 2010. (a) Relative humidity. (b) Precipitation. Circles in (a) show the observed Relative humidity.

**Table S1.** WRF-Chem configurations

|                                             |                                                                                                  |
|---------------------------------------------|--------------------------------------------------------------------------------------------------|
| Meteorology initial and boundary conditions | Reanalysis data from the National Centers for Environmental Prediction Final Analysis (NCEP-FNL) |
| Shortwave radiation                         | rapid radiative transfer model (RRTMG)                                                           |
| Longwave radiation                          | rapid radiative transfer model (RRTMG)                                                           |
| Land surface model                          | Noah land-surface model                                                                          |
| Planetary boundary layer model              | Mellor-Yamada-Janjic (Eta) TKE scheme                                                            |
| Cumulus parameterization                    | New Grell scheme (G3)                                                                            |
| Microphysics                                | Lin et al. Scheme                                                                                |
| Photolysis                                  | Fast-J photolysis                                                                                |

**Table S2.** Performance statistics of meteorological predictions of WRF-Chem.

|                         | T2 <sup>a</sup> | RH2 <sup>a</sup> | WS10 <sup>a</sup> | WD10 <sup>a</sup> |
|-------------------------|-----------------|------------------|-------------------|-------------------|
| Data pairs <sup>b</sup> | 27508           | 27443            | 18036             | 18036             |
| MeanObs <sup>b</sup>    | 30.9            | 69.3             | 2.7               | 165.1             |
| MeanSim <sup>b</sup>    | 31.9            | 63.3             | 2.9               | 152.9             |
| R <sup>b</sup>          | 0.8             | 0.8              | 0.1               | 0.4               |
| MB <sup>b</sup>         | 0.9             | -5.9             | 0.2               | -12.1             |
| RMSE <sup>b</sup>       | 3.6             | 19.8             | 2.7               | 95.2              |
| NMB (%) <sup>b</sup>    | 3.0             | -8.6             | 9.1               | -7.4              |

<sup>a</sup> T2: temperature at 2 m; RH2: relative humidity at 2 m; WS10: wind speed at 10 m; WD10: wind direction at 10 m; SLP: sea level pressure.

<sup>b</sup> data pairs: the number of observed and simulated data pairs; MeanObs: mean observational data; MeanSim: mean simulation results; R: correlation coefficient; MB: mean bias; RMSE: root mean square error; NMB: normalized mean bias.
